# Supplementary material for: Toward a combinatorial nature of microRNA regulation in human cells
Source: PubMed Central journal article supplement — Nucleic Acids Res. 2012 Aug 13;40(19):9404–16. doi: 10.1093/nar/gks759 (PMC3479204; doi:10.1093/nar/gks759), 2012-08-13
Supplement: supp_gks759_nar-01409-2012-File007.pdf [file supp_gks759_nar-01409-2012-File007.pdf]

# Toward a combinatorial nature of microRNA regulation in human cells

Ohad Balaga<sup>1</sup>, Yitzhak Friedman<sup>2</sup>, and Michal Linial<sup>2,\*</sup>

<sup>1</sup>School of Computer Science and Engineering, The Hebrew University of Jerusalem, Israel

<sup>2</sup>Department of Biological Chemistry, Institute of Life Sciences, The Hebrew University of Jerusalem, Israel

## Supplementary Figures

**Figure S1.** Coverage of targeted genes and miRNAs by MDBs.

**Table S2.** Global performance of all MDBs and miRror2.0

**Figure S3.** CLIP data properties

## Supplementary Tables

**Table S1.** Coverage of targeted genes and miRNAs by MDBs.

**Table S2.** List and data on miRNA overexpressed experiments (Agilent and Affymetrix platform)

**Table S3.** miRNA families.

**Table S4.** Down-regulated genes from has-miR-124 overexpression experiment.

**Table S5.** Prediction performance.

**Table S6.** Integrated prediction performance.

**Table S7.** Predictions for MDBs and miRror for CLIP data.

**Table S8.** Pairs of miRNAs that were identified by CLIP data.

**Table S9.** The list of 20 cell-lines transcriptomic experiments.

**Table S10.** Joint miRIS and JI for 200 miRNA-Duos (from 5 top predictions).

## Supplementary Figures

**Figure S1**

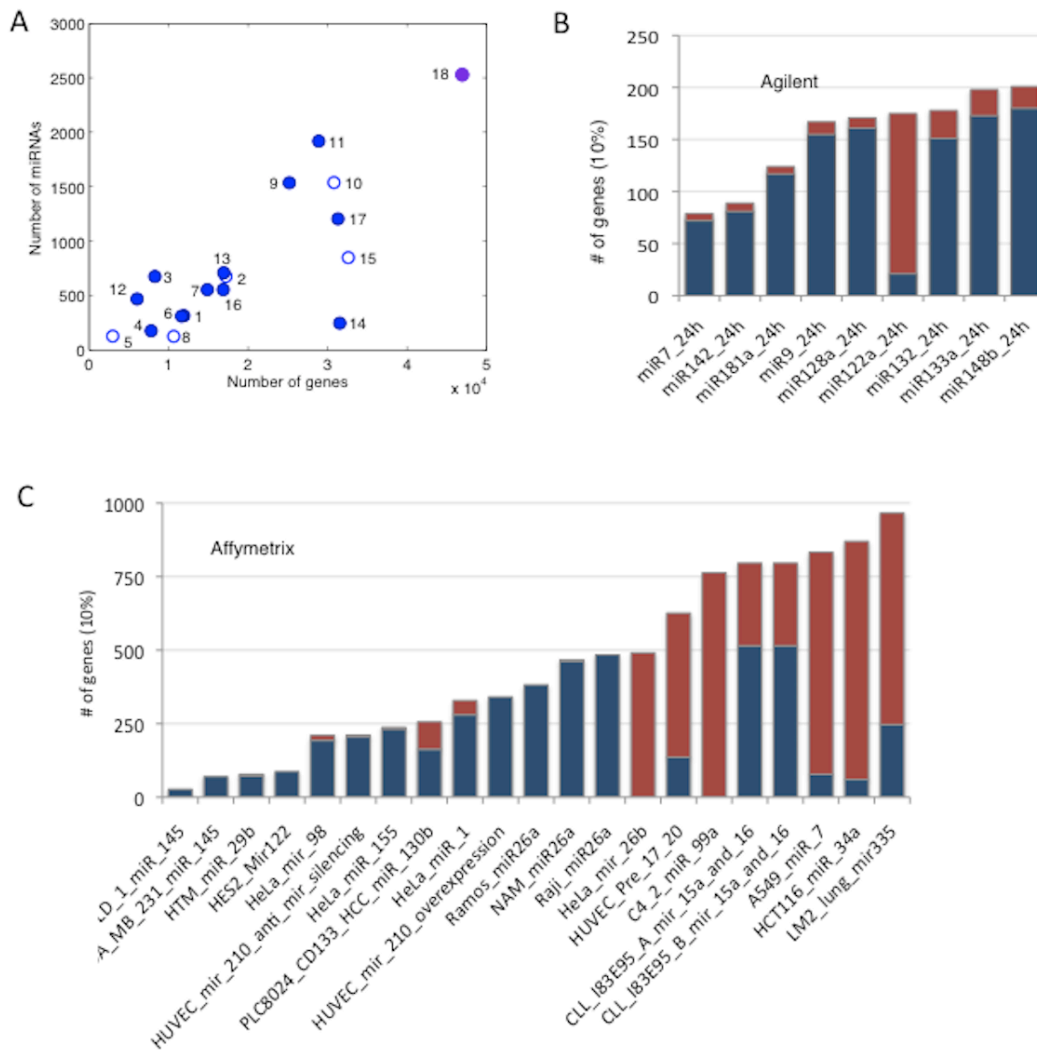

**Figure S1.** miRNAs and target-genes and transcriptomic data. (A) A total of 17 pre-compiled sets are indicated. Number labels indicate each MDB: 1, MAMI; 2, PITA\_all; 3, PITA\_top; 4, PicTar 4way; 5, PicTar 5way; 6, RNA22; 7, TargetRank all; 8, TargetRank\_conserved; 9, TargetScan\_conserved; 10, TargetScan\_nonconserved; 11, miRDB; 12, miRNAMap2; 13, microCosm; 4, microRNA.org\_conserved; 15, microRNA.org\_nonconserved; 16, microT; 17, MirZ; 18, A unified set that is supported by miRror (shown in purple). Filled circles are the MDBs that are further analyzed in this work. The coverage of miRNAs and gene-targets of each MDB differs significantly. For example, TargetScan covers ~1500 miRNA and ~25,000 genes, while miRNAMap2 covers 470 miRNA and ~6000 genes (*Supplementary Table S1*). The down-regulated genes from miRNA overexpression experiments measured by Agilent (B) or Affymetrix (C) platforms (*Supplementary Table S2*). The number of genes that were suppressed by a differential ratio >1.2 is shown. For example, for hsa-miR-145 (DLD-1 cells, GSE18625) only 270 genes meet the threshold while for hsa-miR-34a (HCT116 cells, GSE7754) this number reaches 8230 genes. The fraction of genes suppressed by a differential  $\geq 3$  is indicated in red. For most experiments, only few genes differentially expressed at this threshold (red bars). The amount of such genes is significantly lower in the data collected from Agilent platform (t-test, P value = 0.002).

**Figure 2**

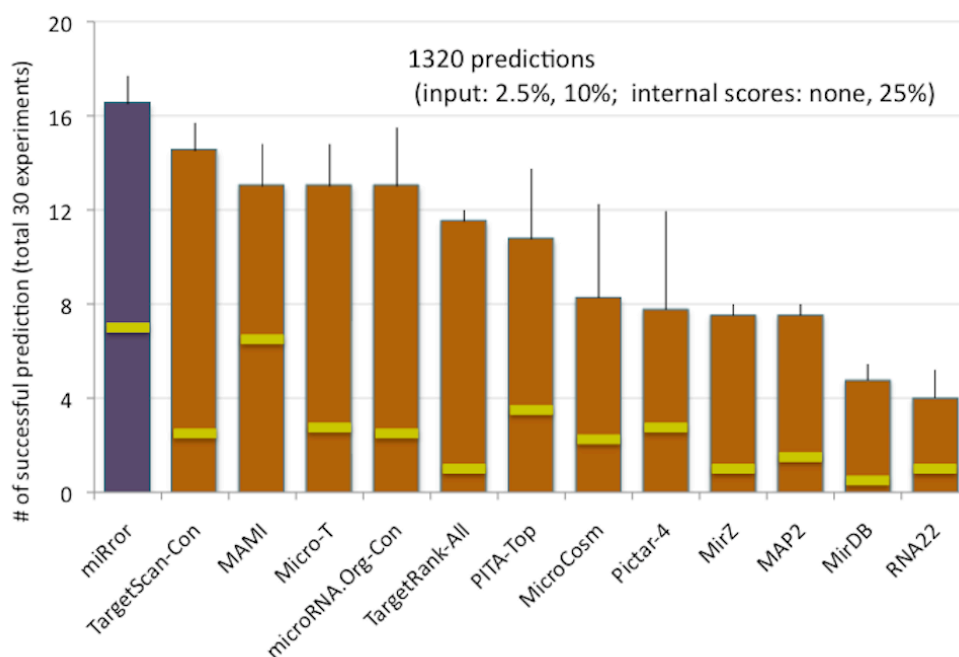

**Figure S2.** Integrated miRNA prediction success. The robustness of each MDB and miRror to parameters is tested. A total of 1440 prediction experiments are shown. Each bar is a summary of 120 predictions. Standard deviations were calculated from the average value of the prediction success for 4 sets (30 experiments, input of 2.5%, 10% with or without a filtration by internal score). The predictions are considered a success if at the top 9 predictions. Yellow line, the appropriate miRNA was the first in the ranked list. miRror predictions are colored purple. Source data for miRror performance in *Supplementary Table S6*.

### Figure S3

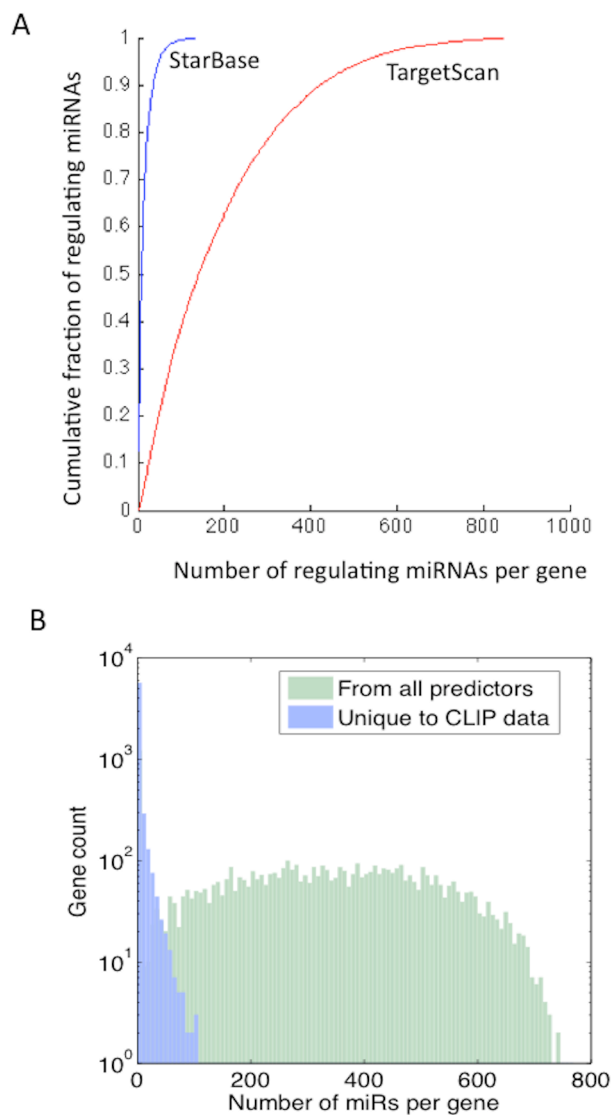

**Figure S3.** Statistics of the CLIP data. (A) The cumulative prediction of TargetScan in view of the actual numbers of miRNA that were collected from the unified human CLIP

data (from StarBase). The discrepancy between the real observation and the prediction is emphasized. (B) The number of genes according to the number of miRNAs per gene is plotted. Note that the distribution for the CLIP data differs from the union of the 12 MDBs. A predicted regulation of a gene by hundreds of miRNAs reflects the high number of false positives by the MDBs.

## **Supplementary Tables**    *[Dataset] – Tables appear as unified xlsx file*

**Table S1.** Coverage of targeted genes and miRNAs by all tested MDBs.

**Table S2.** **[Dataset]** Overexpressed miRNA experiments according to their platforms.

**Table S3.** miRNA families.

**Table S4.** **[Dataset]** Down-regulated genes from an overexpression experiment of hsa-miR-124.

**Table S5.** **[Dataset]** Prediction performance (top) and internal scoring (bottom)

**Table S6.** **[Dataset]** Integrated prediction performance (top) and internal scoring (bottom).

**Table S7.** **[Dataset]** Predictions for MDBs and miRror for CLIP data.

**Table S8.** Pairs of miRNAs that were identified by CLIP data.

**Table S9.** The list of the 20 transcriptome cell-lines transcriptomic experiments.

**Table S10.** **[Dataset]** Joint miRIS and JI for 200 miRNA-Duos (from 5 top predictions).

**Table S1.** Coverage of targeted genes and miRNAs by MDBs.

| DB                        | Genes | miRNAs |
|---------------------------|-------|--------|
| MAMI                      | 11914 | 317    |
| PITA all                  | 17216 | 677    |
| PITA top                  | 8292  | 677    |
| PicTar 4way               | 7817  | 178    |
| PicTar 5way               | 2972  | 129    |
| RNA22                     | 11641 | 313    |
| TargetRank all            | 14874 | 555    |
| TargetRank conserved      | 10652 | 127    |
| TargetScan                | 16785 | 249    |
| TargetScan conserved      | 25186 | 1536   |
| TargetScan nonconserved   | 30802 | 1538   |
| miRDB                     | 28890 | 1918   |
| miRNAMap2                 | 6040  | 470    |
| microCosm                 | 16933 | 711    |
| microRNA.org              | 15400 | 677    |
| microRNA.org conserved    | 31526 | 248    |
| microRNA.org nonconserved | 32601 | 850    |
| microT                    | 16882 | 555    |
| mirZ                      | 31302 | 1205   |
| Combined (miRror)         | 46921 | 2540   |

**Table S3.** Compression of miRNA by a family assignment for 12 MDBs.

| Name             | All miRNAs | miRNA families (Seed based) <sup>a</sup> | miRNA families (miRBase) | # of genes (for miRNAs) | # of genes (for families) |
|------------------|------------|------------------------------------------|--------------------------|-------------------------|---------------------------|
| miRDB            | 1918       | 1238                                     | 303                      | 28890                   | 25337                     |
| TargetScan_Con   | 1536       | 1035                                     | 406                      | 25186                   | 22571                     |
| mirZ             | 1205       | 858                                      | 396                      | 31302                   | 31179                     |
| microCosm        | 711        | 505                                      | 261                      | 16933                   | 16626                     |
| PITA_TOP         | 677        | 481                                      | 348                      | 8292                    | 7922                      |
| microT           | 555        | 384                                      | 261                      | 16882                   | 16784                     |
| TargetRank_all   | 555        | 384                                      | 261                      | 14874                   | 14147                     |
| miRNAMap2        | 470        | 282                                      | 260                      | 6040                    | 6035                      |
| MAMI             | 317        | 162                                      | 150                      | 11914                   | 11578                     |
| RNA22            | 313        | 160                                      | 148                      | 11641                   | 11491                     |
| microRNA.org_Con | 248        | 146                                      | 125                      | 31526                   | 31191                     |
| PicTar_4way      | 178        | 84                                       | 98                       | 7817                    | 7535                      |

<sup>a</sup>Seed families are defined by a shard seed sequence (nucleotides 2-7).

**Table S8.** Pairs of miRNAs that were identified by CLIP data. The JI is shown.

| DB               | miRs | pairs   | JI mean | JI variance |
|------------------|------|---------|---------|-------------|
| microT           | 555  | 153735  | 0.13428 | 0.00441     |
| mirZ             | 1206 | 726615  | 0.12883 | 0.00454     |
| miRNAMap2        | 470  | 110215  | 0.12765 | 0.00609     |
| microRNA.org_Con | 249  | 30876   | 0.09604 | 0.00572     |
| TargetRank_all   | 555  | 153735  | 0.05547 | 0.00299     |
| RNA22            | 313  | 48828   | 0.04680 | 0.00136     |
| PicTar_4way      | 178  | 15753   | 0.04522 | 0.00627     |
| PITA_TOP         | 677  | 228826  | 0.03211 | 0.00180     |
| microCosm        | 711  | 252405  | 0.03097 | 0.00032     |
| TargetScan_Con   | 1537 | 1180416 | 0.02765 | 0.00095     |
| MAMI             | 317  | 50086   | 0.01946 | 0.00219     |
| miRDB            | 1919 | 1840321 | 0.01713 | 0.00056     |
| StarBase (CLIP)  | 653  | 212878  | 0.02001 | 0.00093     |

**Table S9.** The list of the 20 transcriptomics cell-culture transcriptomic experiments.

| GEO acc. | Condition                 | Cell line    | Genes | Best Pair |         | Joint-miRIS |
|----------|---------------------------|--------------|-------|-----------|---------|-------------|
|          |                           |              |       | miR A     | miR B   |             |
| GSE12792 | Hypoxia                   | RPTEC        | 47    | miR-624   | miR-26  | 0.640957    |
| GSE10043 | Hyperthermia              | U937         | 114   | miR-586   | miR-153 | 0.47807     |
| GSE7355  | C. albicans infection     | HUVEC        | 123   | miR-137   | miR-571 | 0.395325    |
| GSE10212 | Ultrasound                | U937         | 105   | miR-19    | miR-30  | 0.697619    |
| GSE9714  | Interferon                | Nu61         | 111   | miR-203   | miR-144 | 0.310811    |
| GSE9714  | Interferon                | SCC-61       | 124   | miR-322   | miR-193 | 0.251344    |
| GSE6927  | S. gordonii infection     | HIGK         | 98    | miR-132   | miR-568 | 0.402211    |
| GSE6927  | F. nucleatum infection    | HIGK         | 92    | miR-203   | miR-26  | 0.626812    |
| GSE8562  | XBP1                      | MCF7         | 37    | miR-154   | miR-8   | 0.547297    |
| GSE6263  | PTEN -/-                  | HCT116       | 81    | miR-452   | miR-578 | 0.308642    |
| GSE2067  | HCV Core                  | HepG2        | 33    | miR-621   | miR-128 | 0.465909    |
| GSE3407  | CSB mutant                | fibroblasts  | 110   | miR-25    | miR-145 | 0.367424    |
| GSE4817  | S1P                       | glioblastoma | 44    | miR-150   | miR-345 | 0.401515    |
| GSE4425  | Hypothermia               | THP1         | 107   | miR-8     | miR-155 | 0.357866    |
| GSE2450  | atorvastatin + mevalonate | HUVEC        | 141   | miR-340   | miR-103 | 0.468972    |
| GSE2450  | mevalonate                | HUVEC        | 138   | miR-568   | miR-10  | 0.23913     |
| GSE2450  | atorvastatin              | HUVEC        | 134   | miR-944   | miR-367 | 0.462687    |
| GSE2451  | camptothecin              | 293T         | 121   | miR-218   | miR-374 | 0.639807    |
| GSE2668  | ATRA + antibiotics        | OCI/AML-2    | 126   | miR-19    | miR-595 | 0.492063    |
| GSE2668  | VPA + antibiotics         | OCI/AML-2    | 126   | miR-630   | miR-217 | 0.367063    |
